# Supplementary material for: Yellow-to-brown and yellow-to-green electrochromic devices based on complexes of transition metal ions with a triphenylamine-based ligand
Source: Royal Society of Chemistry journal article supplement (doi:10.1039/d0dt03232h), 2020-01-01
Supplement: d0dt03232h1.pdf [file d0dt03232h1.pdf]

## Supporting information

# Yellow-to-brown and yellow-to-green electrochromic devices based on complexes of transition metal ions with triphenylamine- based ligand

Radosław Banasz,<sup>a,b</sup> Maciej Kubicki,<sup>a</sup> Monika Wałęsa-Chorab<sup>a,b\*</sup>

<sup>a</sup> *Faculty of Chemistry, Adam Mickiewicz University in Poznań, Uniwersytetu Poznańskiego  
8, 61-614 Poznań, Poland*

<sup>b</sup> *Centre for Advanced Technologies, Adam Mickiewicz University, Uniwersytetu  
Poznańskiego 10, 61-614 Poznań, Poland*

*Corresponding author e-mail: mchorab@amu.edu.pl*

## Table of Contents

|                                                                                                                                                                                                                                                                                                                                                                                                                       |    |
|-----------------------------------------------------------------------------------------------------------------------------------------------------------------------------------------------------------------------------------------------------------------------------------------------------------------------------------------------------------------------------------------------------------------------|----|
| <b>Figure S 1.</b> FTIR spectra of ligand <b>L</b> (black), Fe(II) complex (red), Co(II) complex (blue) and Zn(II) complex (magenta). .....                                                                                                                                                                                                                                                                           | 3  |
| <b>Figure S 2.</b> Presentation of the short contacts between the perchlorate anion and the cation complexes. ....                                                                                                                                                                                                                                                                                                    | 3  |
| <b>Figure S 3.</b> XPS survey spectrum of ligand <b>L</b> (red) and its complexes with Fe(II) (green), Co(II) (blue) and Zn(II) (black) metal ions. The major XPS peaks are marked. ....                                                                                                                                                                                                                              | 4  |
| <b>Figure S 4.</b> CV and SWV of ligand <b>L</b> measured in anhydrous and deaerated 0.1 M solution of TBAClO <sub>4</sub> in PC as an electrolyte at 50 mV/s scan rate. ....                                                                                                                                                                                                                                         | 4  |
| <b>Figure S 5.</b> A) CV profiles of Fe(II) complex at different scan rates; B) Peak current vs. the square root of the scan rate for the Fe(II) complex. ....                                                                                                                                                                                                                                                        | 5  |
| <b>Figure S 6.</b> A) CV profiles of Zn(II) complex at different scan rates; B) Peak current vs. the square root of the scan rate for the Zn(II) complex. ....                                                                                                                                                                                                                                                        | 5  |
| <b>Figure S 7.</b> The UV-Vis spectra of ligand <b>L</b> in its neutral (black) and oxidized (red) states. ....                                                                                                                                                                                                                                                                                                       | 6  |
| <b>Figure S 8.</b> The zoom of MLCT and LMCT bands in spectroelectrochemistry of Fe(II) complex in anhydrous and deaerated PC with 0.1 M TBAClO <sub>4</sub> as a supporting electrolyte by applying potentials of 0V (■), +0.7V (■), +0.8V (■), +0.9V (■) and +1.0V (■) versus Ag/AgCl gel reference electrode held for 30 s per potential. Inset: photographs of complex Fe(II) in two different redox states. .... | 6  |
| <b>Figure S 9.</b> AFM micrographs of complex Fe(II) (A), Co(II) (B) and Zn(II) (C) spray-coated on ITO electrodes. AFM cross-section profiles were measured at a marked places. ....                                                                                                                                                                                                                                 | 7  |
| <b>Figure S 10.</b> AFM cross-section profiles of complexes: Fe(II) (black), Co(II) (red) and Zn(II) (blue) measured at marked places. ....                                                                                                                                                                                                                                                                           | 7  |
| <b>Figure S11.</b> HR-ESI-MS spectrum of Fe(II) complex. ....                                                                                                                                                                                                                                                                                                                                                         | 8  |
| <b>Figure S12.</b> HR-ESI-MS spectra of Co(II) complex. ....                                                                                                                                                                                                                                                                                                                                                          | 8  |
| <b>Figure S13.</b> HR-ESI-MS spectra of Zn(II) complex. ....                                                                                                                                                                                                                                                                                                                                                          | 9  |
| <b>Figure S14.</b> HR-ESI-MS spectra of ligand <b>L</b> . ....                                                                                                                                                                                                                                                                                                                                                        | 9  |
| <b>Figure S15.</b> HR-ESI-MS spectra of compound <b>A</b> . ....                                                                                                                                                                                                                                                                                                                                                      | 10 |
| <b>Figure S16.</b> HR-ESI-MS spectra of compound <b>B</b> . ....                                                                                                                                                                                                                                                                                                                                                      | 10 |
| <b>Figure S17.</b> <sup>1</sup> H NMR spectra of ligand <b>L</b> in d <sub>6</sub> -DMSO. ....                                                                                                                                                                                                                                                                                                                        | 11 |
| <b>Figure S18.</b> <sup>13</sup> C NMR spectra of ligand <b>L</b> in d <sub>6</sub> -DMSO. ....                                                                                                                                                                                                                                                                                                                       | 11 |
| <b>Figure S19.</b> <sup>1</sup> H NMR spectra of compound <b>A</b> in CDCl <sub>3</sub> . ....                                                                                                                                                                                                                                                                                                                        | 12 |
| <b>Figure S20.</b> <sup>13</sup> C NMR of compound <b>A</b> in CDCl <sub>3</sub> . ....                                                                                                                                                                                                                                                                                                                               | 12 |
| <b>Figure S21.</b> <sup>1</sup> H NMR spectra of compound <b>B</b> in CDCl <sub>3</sub> . ....                                                                                                                                                                                                                                                                                                                        | 13 |
| <b>Figure S22.</b> <sup>13</sup> C NMR spectra of compound <b>B</b> in CDCl <sub>3</sub> . ....                                                                                                                                                                                                                                                                                                                       | 13 |

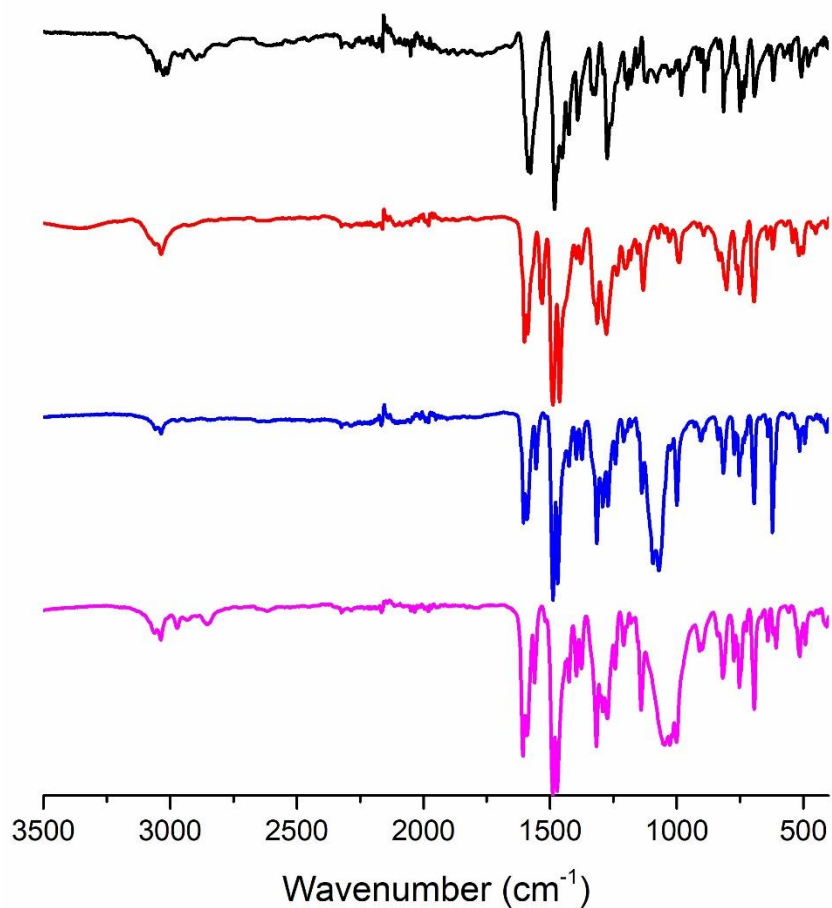

**Figure S 1.** FTIR spectra of ligand **L** (black), Fe(II) complex (red), Co(II) complex (blue) and Zn(II) complex (magenta).

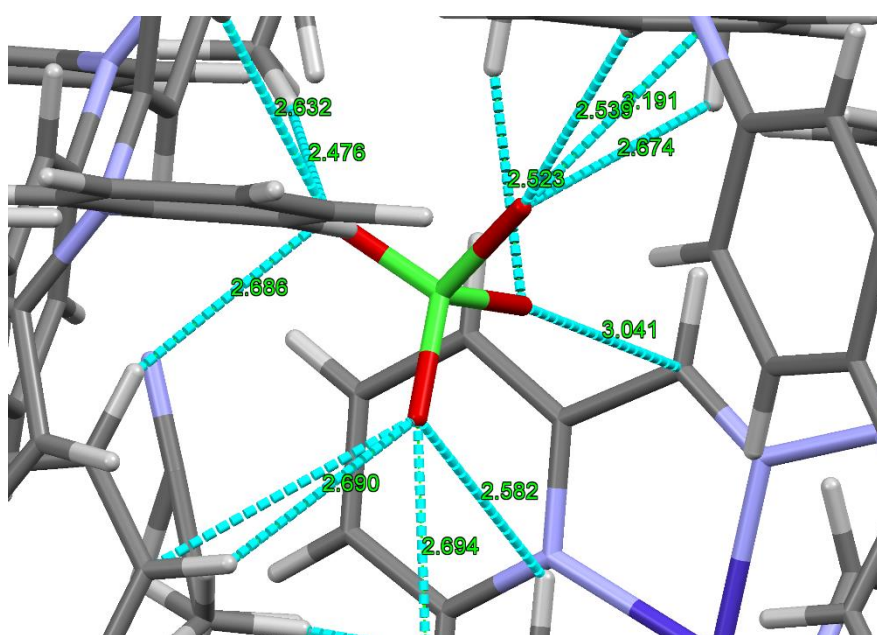

**Figure S 2.** Presentation of the short contacts between the perchlorate anion and the cation complexes.

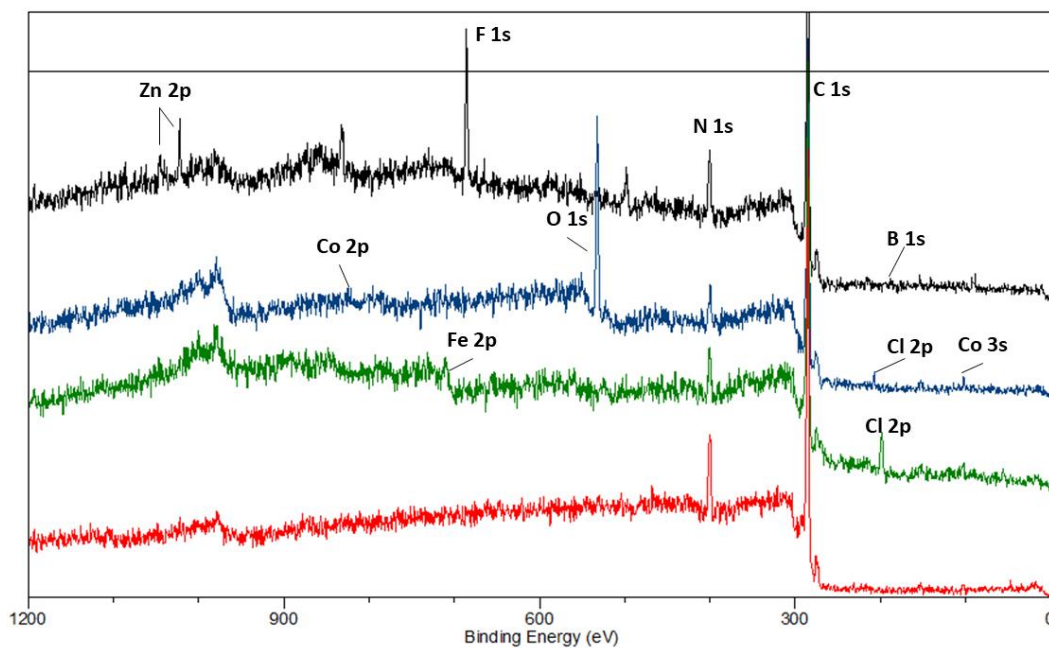

**Figure S 3.** XPS survey spectrum of ligand **L** (red) and its complexes with Fe(II) (green), Co(II) (blue) and Zn(II) (black) metal ions. The major XPS peaks are marked.

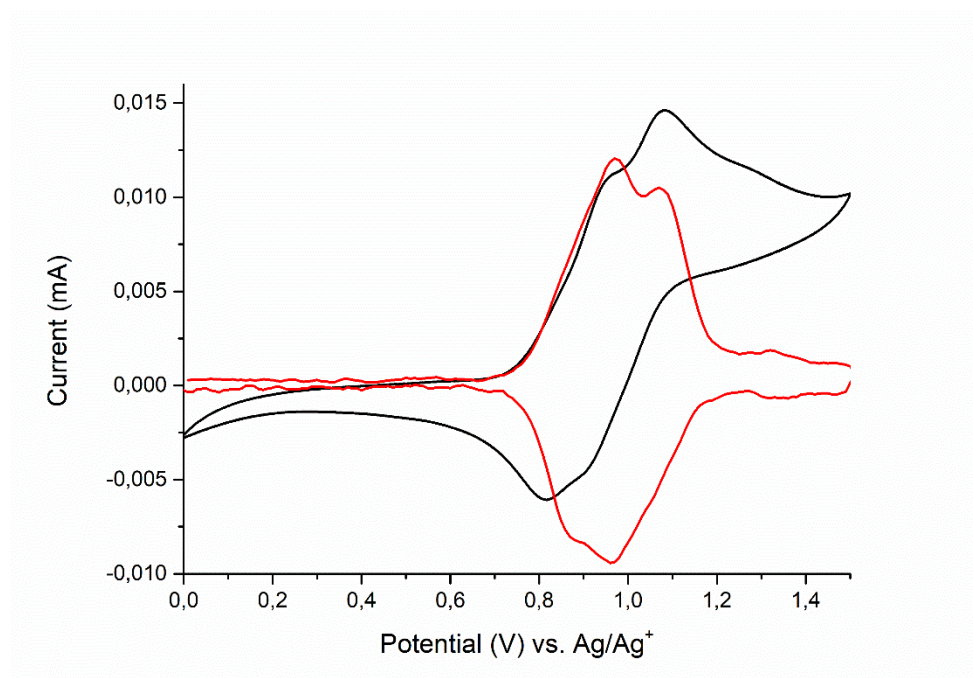

**Figure S 4.** CV and SWV of ligand **L** measured in anhydrous and deaerated 0.1 M solution of TBAClO<sub>4</sub> in PC as an electrolyte at 50 mV/s scan rate.

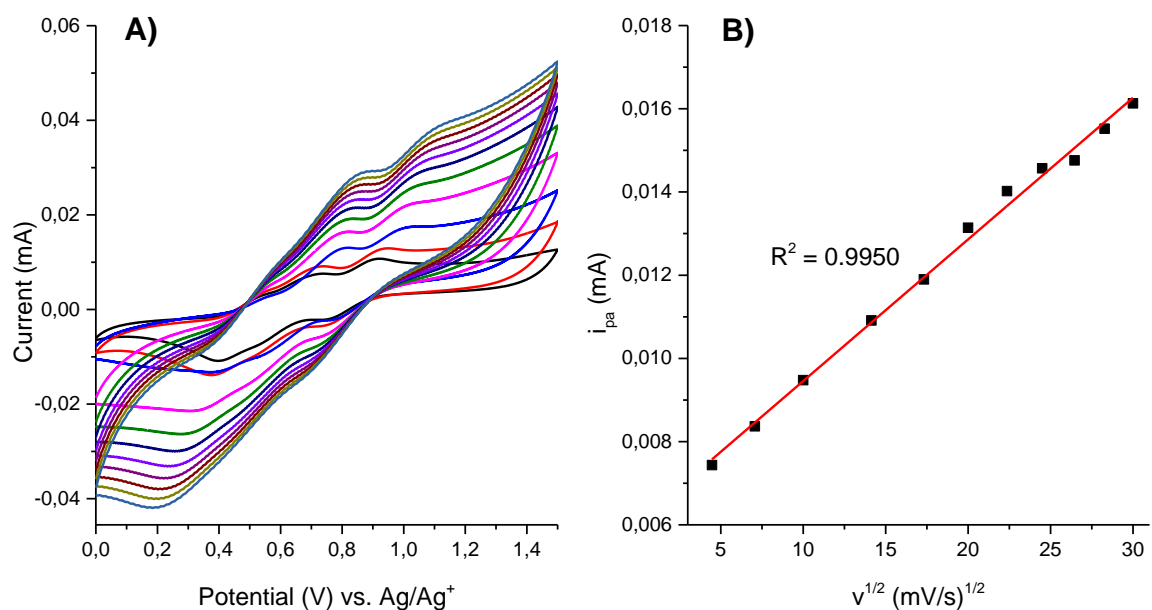

**Figure S 5.** A) CV profiles of Fe(II) complex at different scan rates; B) Peak current vs. the square root of the scan rate for the Fe(II) complex.

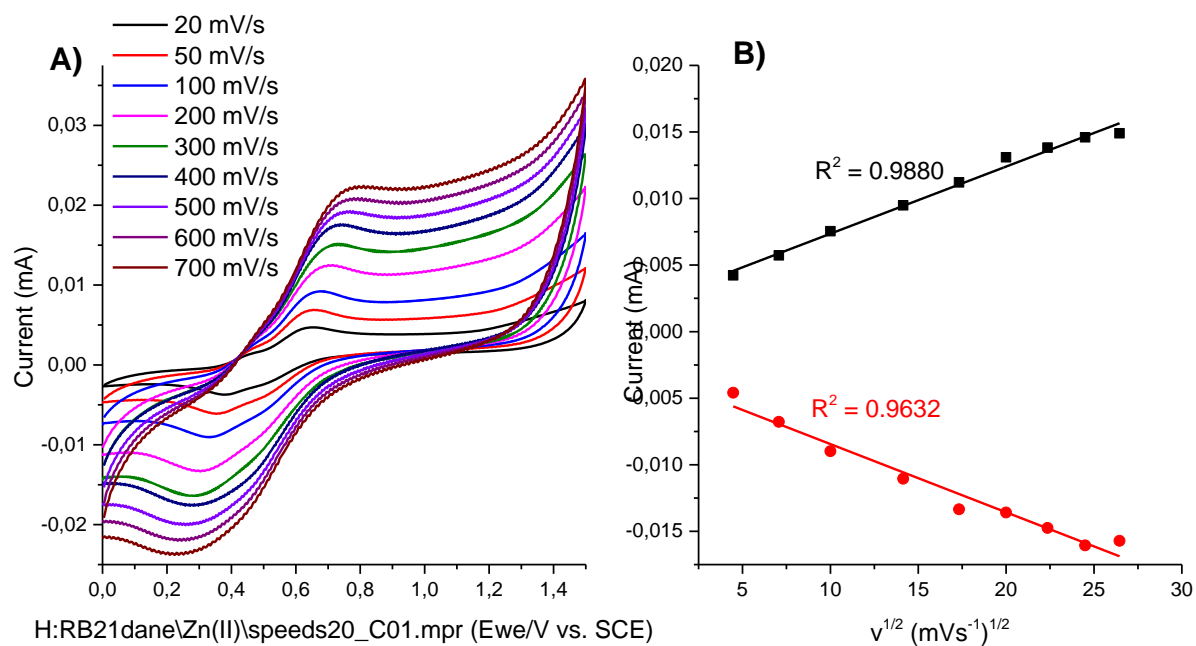

**Figure S 6.** A) CV profiles of Zn(II) complex at different scan rates; B) Peak current vs. the square root of the scan rate for the Zn(II) complex.

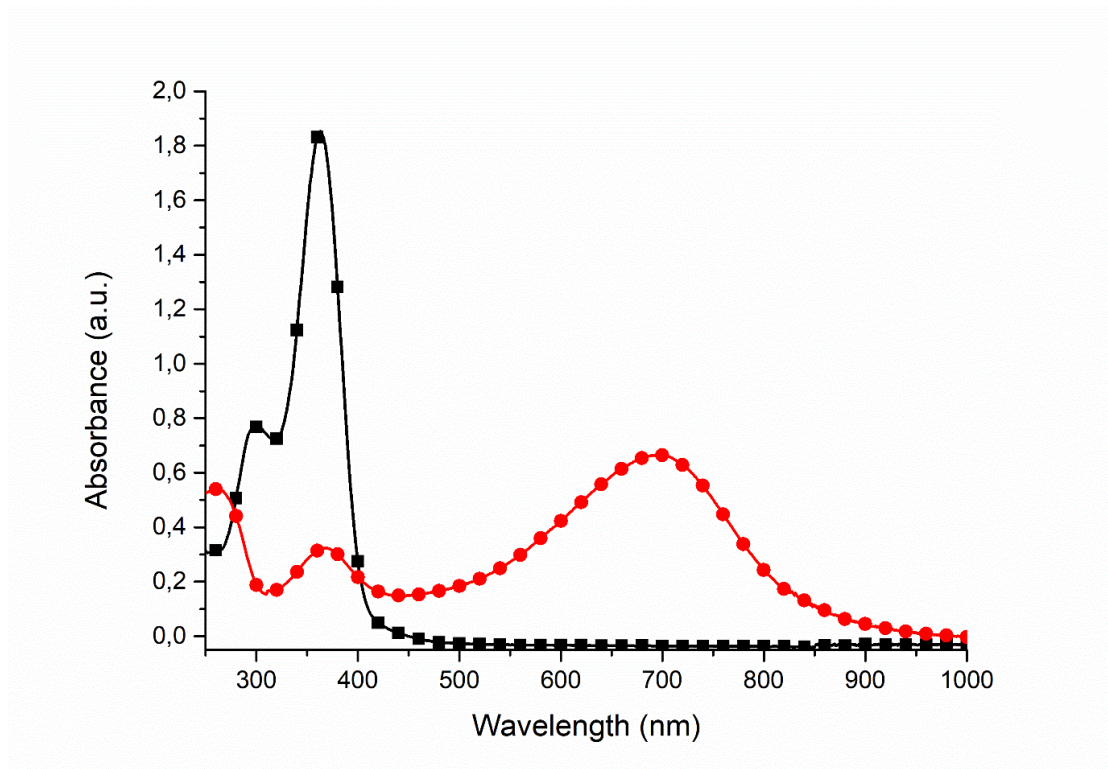

**Figure S 7.** The UV-Vis spectra of ligand **L** in its neutral (black) and oxidized (red) states.

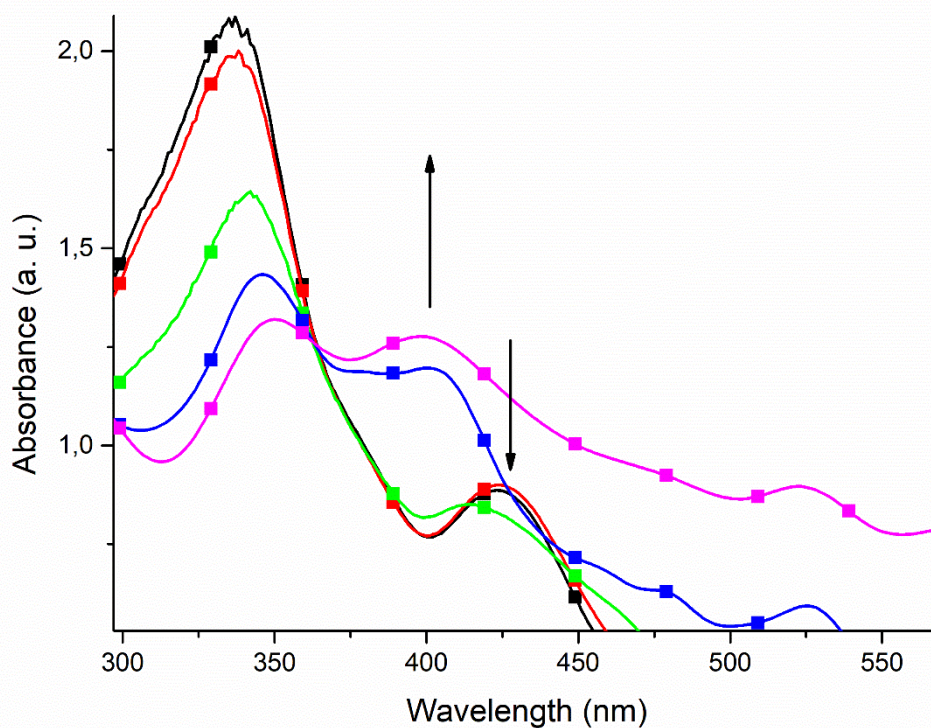

**Figure S 8.** The zoom of MLCT and LMCT bands in spectroelectrochemistry of Fe(II) complex in anhydrous and deaerated PC with 0.1 M TBAClO<sub>4</sub> as a supporting electrolyte by applying potentials of 0V (■), +0.7V (■), +0.8V (■), +0.9V (■) and +1.0V (■) versus Ag/AgCl gel

reference electrode held for 30 s per potential. Inset: photographs of complex Fe(II) in two different redox states.

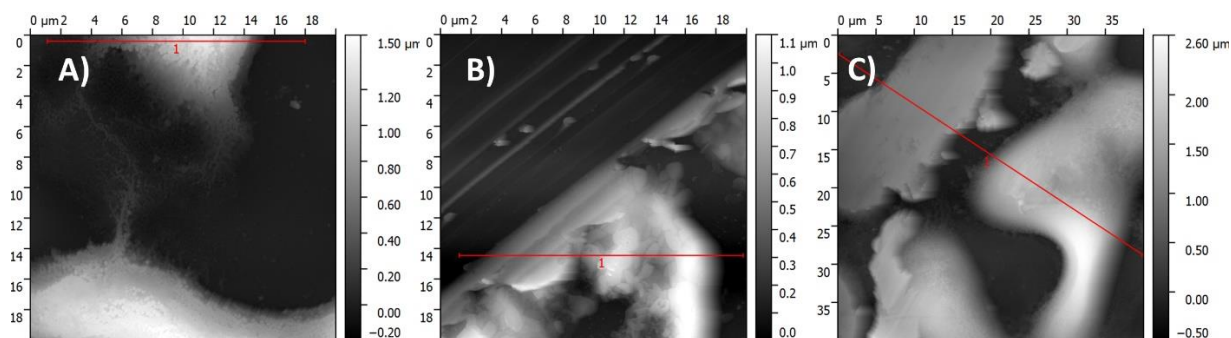

**Figure S 9.** AFM micrographs of complex Fe(II) (A), Co(II) (B) and Zn(II) (C) spray-coated on ITO electrodes. AFM cross-section profiles were measured at a marked places.

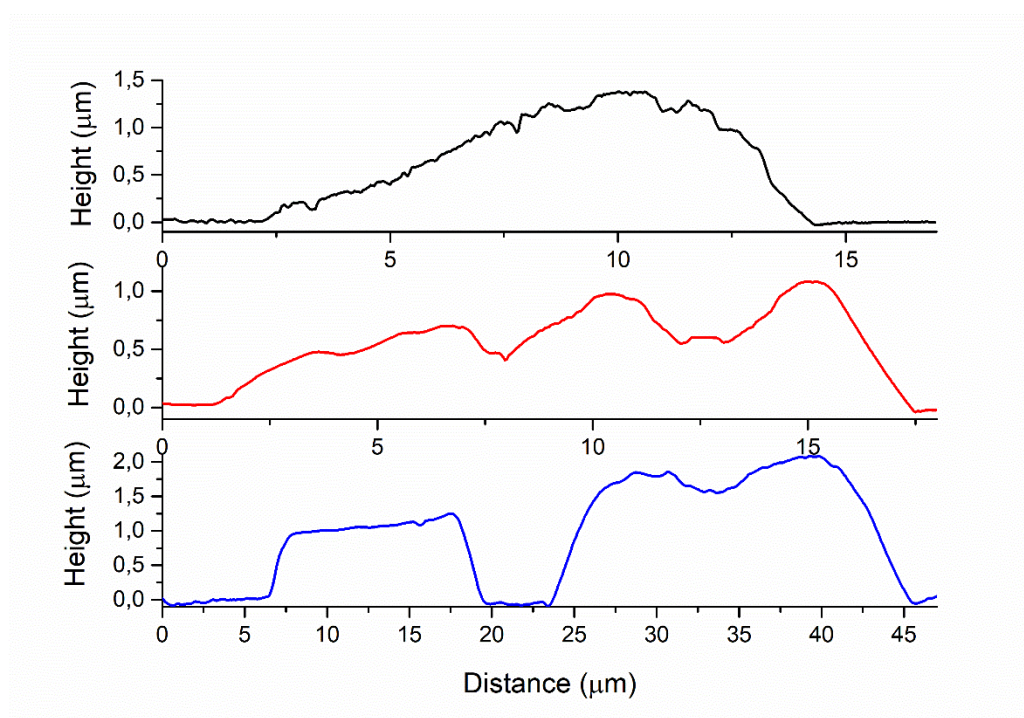

**Figure S 10.** AFM cross-section profiles of complexes: Fe(II) (black), Co(II) (red) and Zn(II) (blue) measured at marked places.

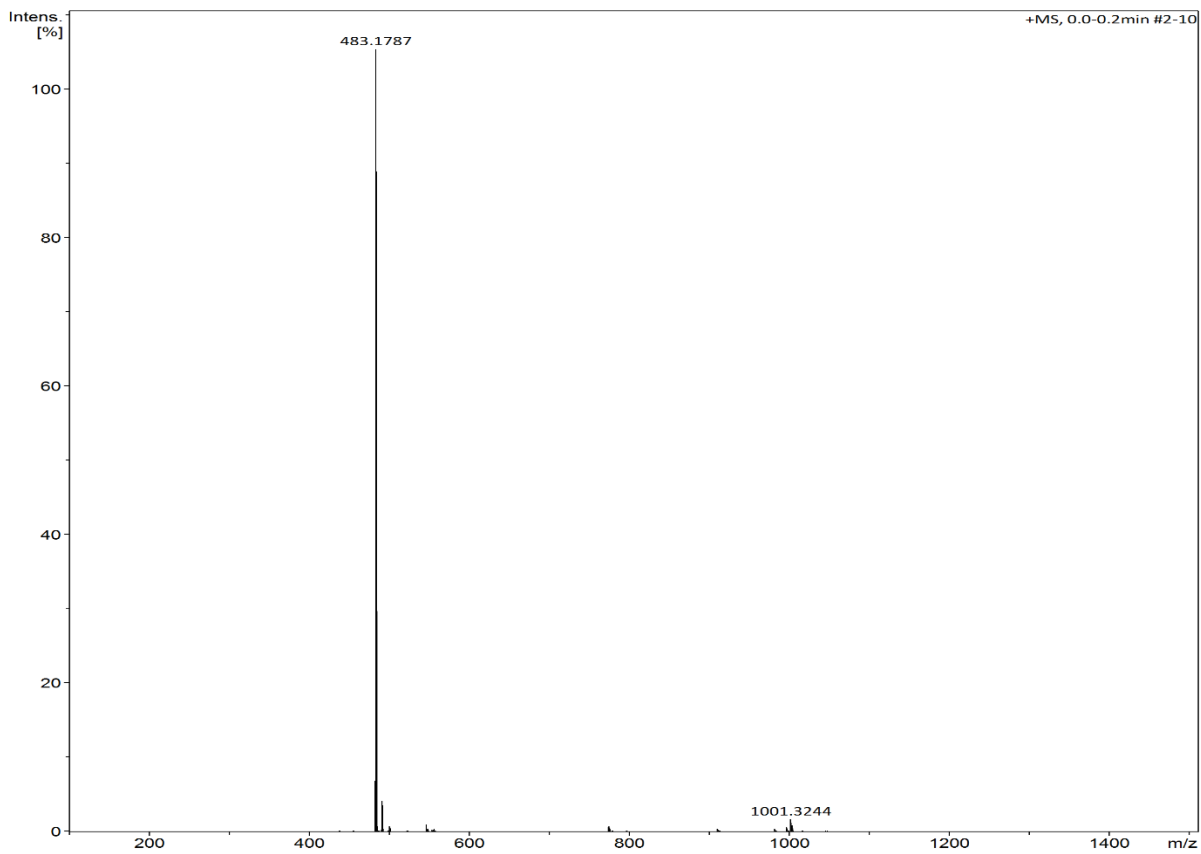

**Figure S11.** HR-ESI-MS spectrum of Fe(II) complex.

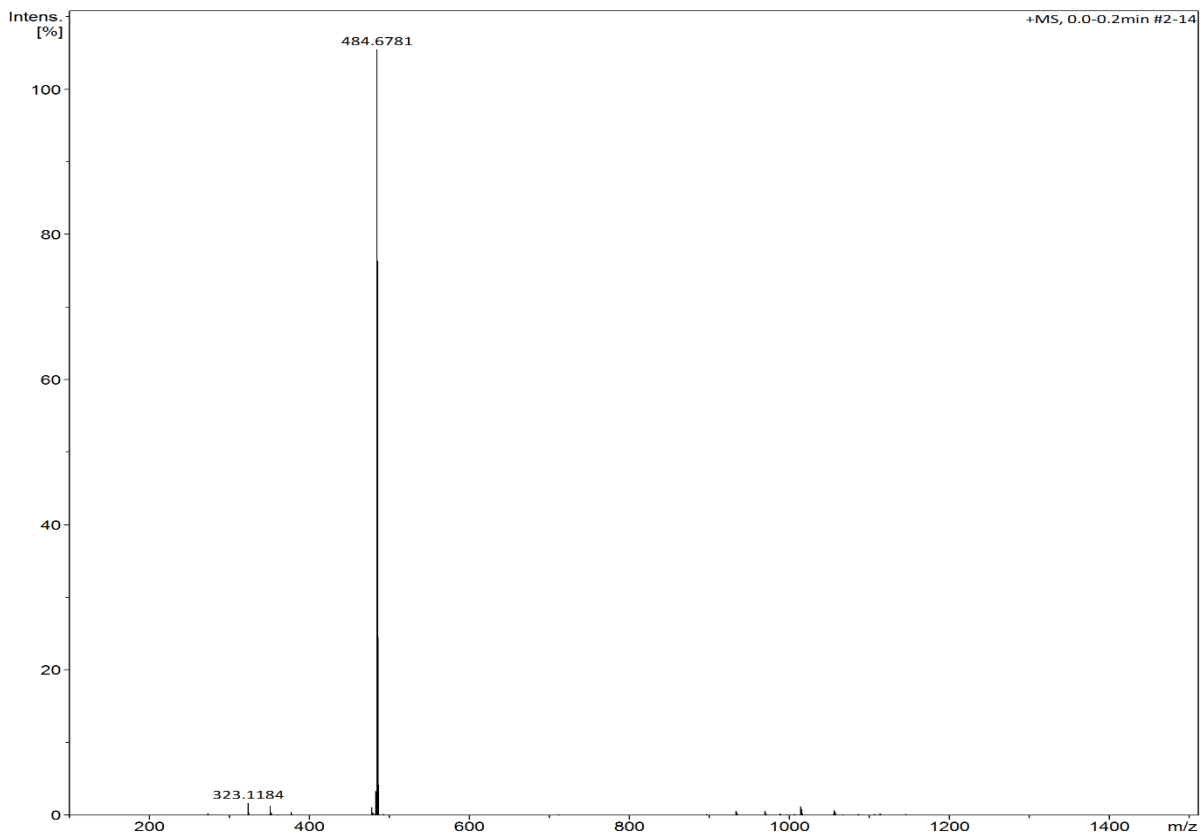

**Figure S12.** HR-ESI-MS spectra of Co(II) complex.



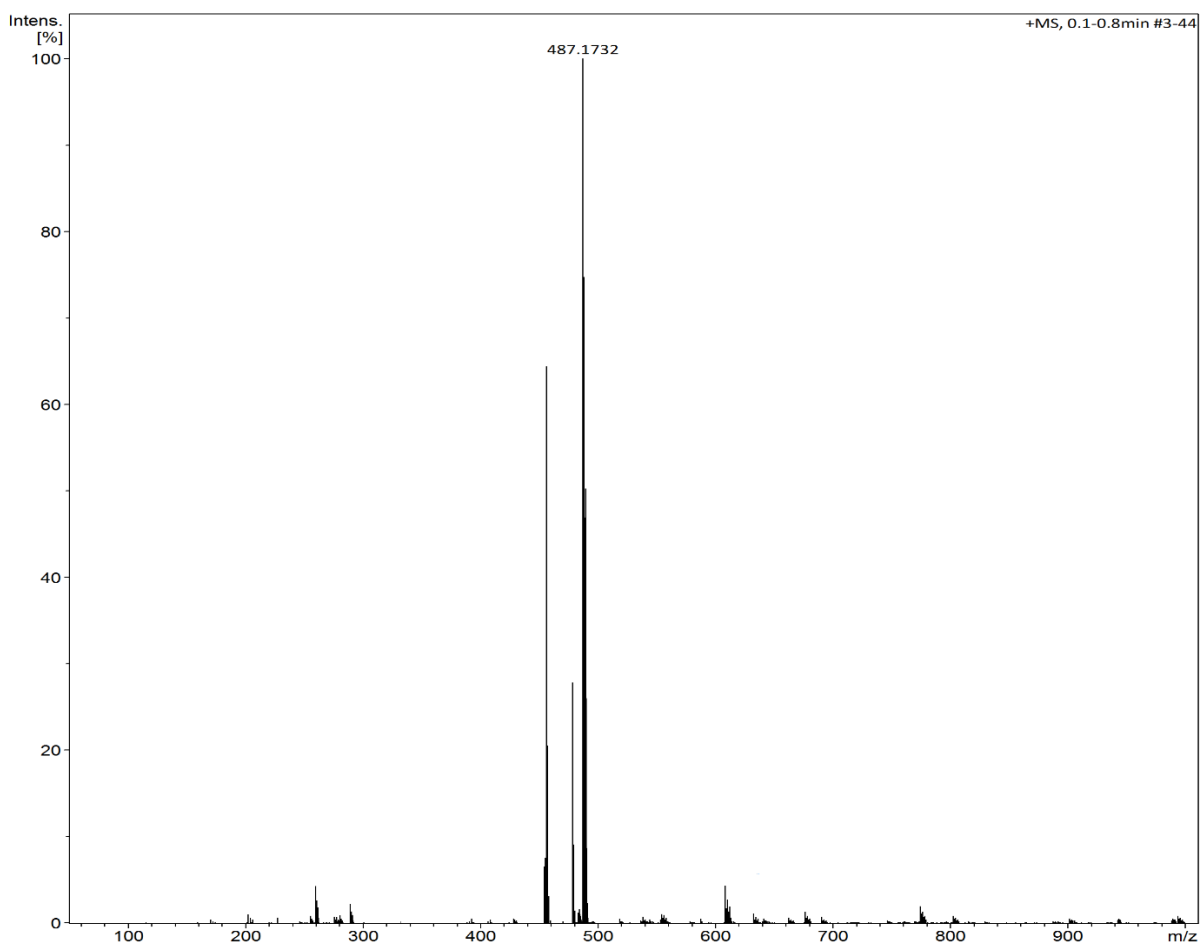

**Figure S13.** HR-ESI-MS spectra of Zn(II) complex.

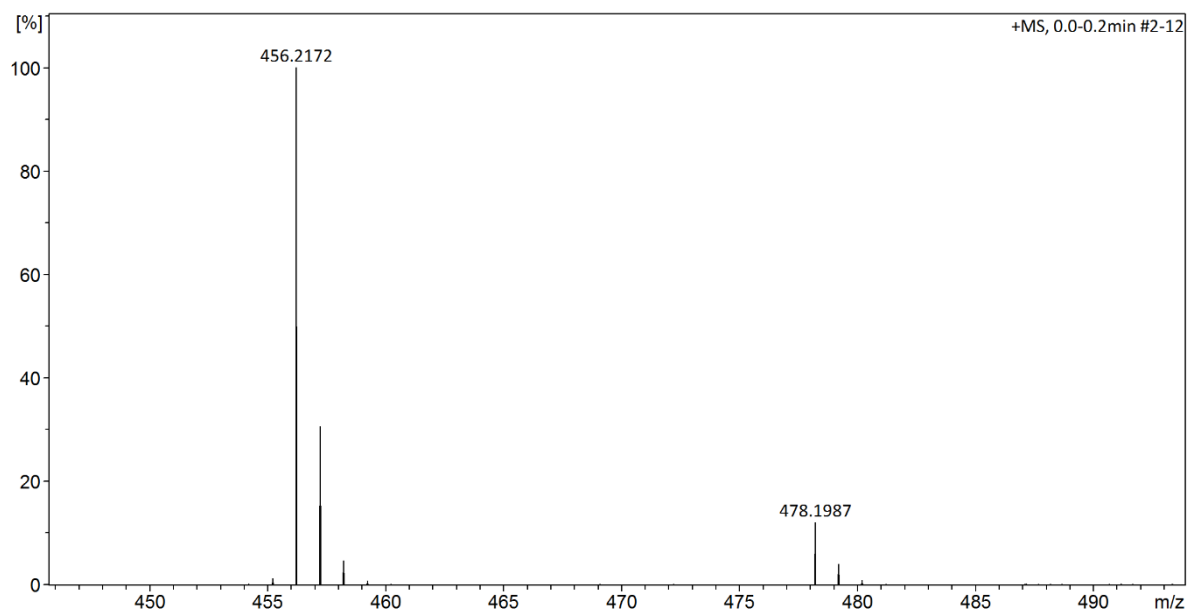

**Figure S14.** HR-ESI-MS spectra of ligand L.

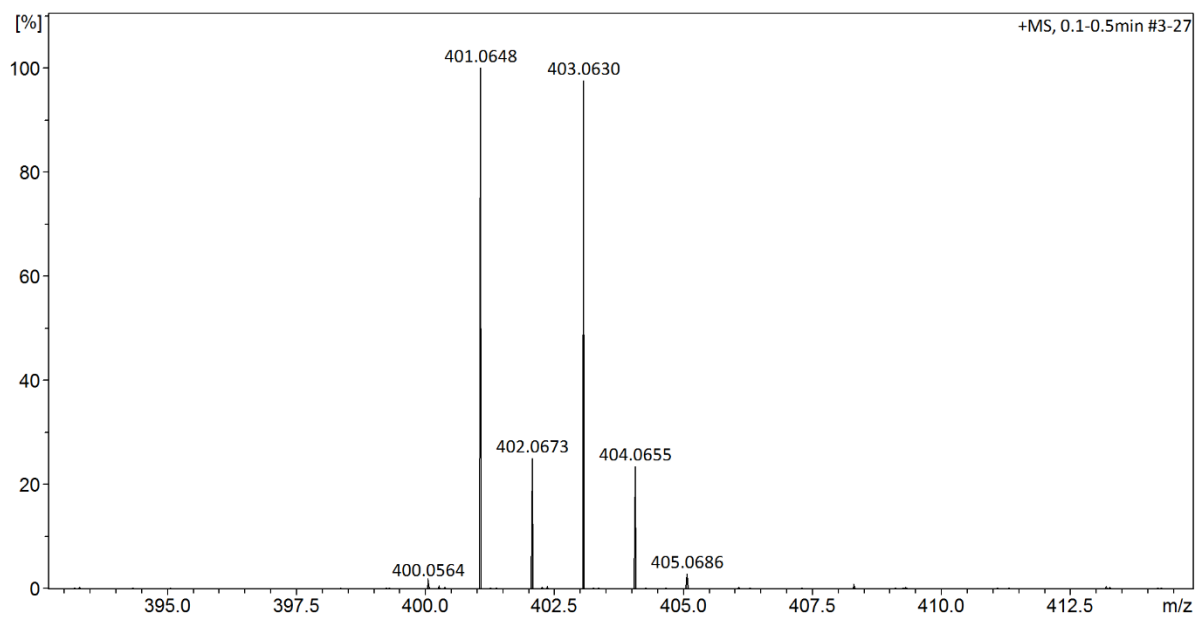

**Figure S15.** HR-ESI-MS spectra of compound **A**.

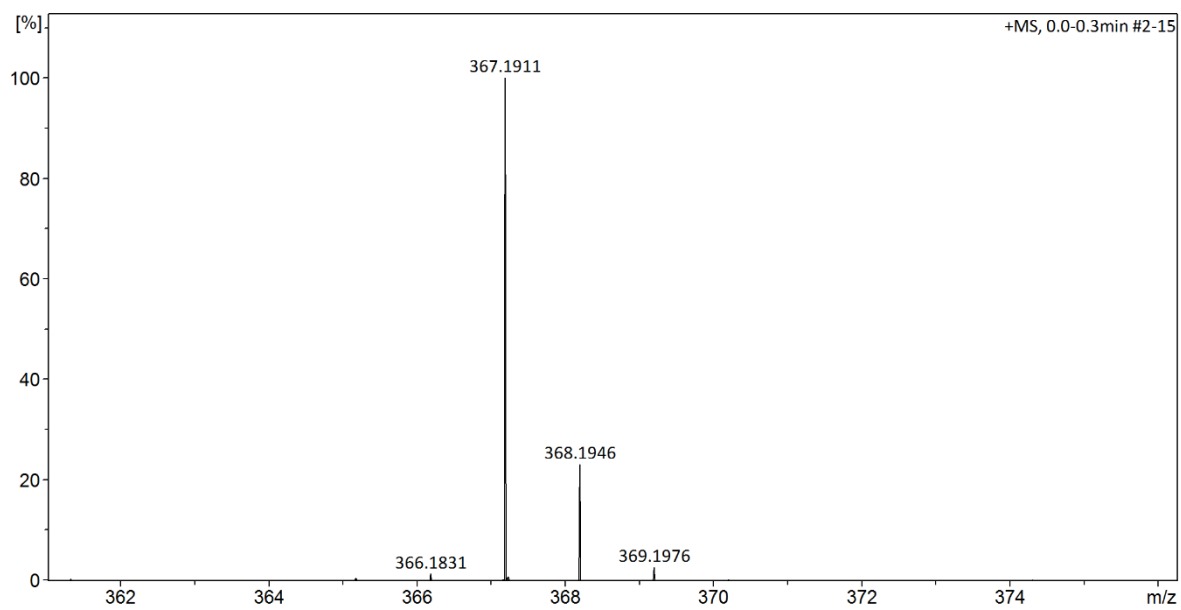

**Figure S16.** HR-ESI-MS spectra of compound **B**.

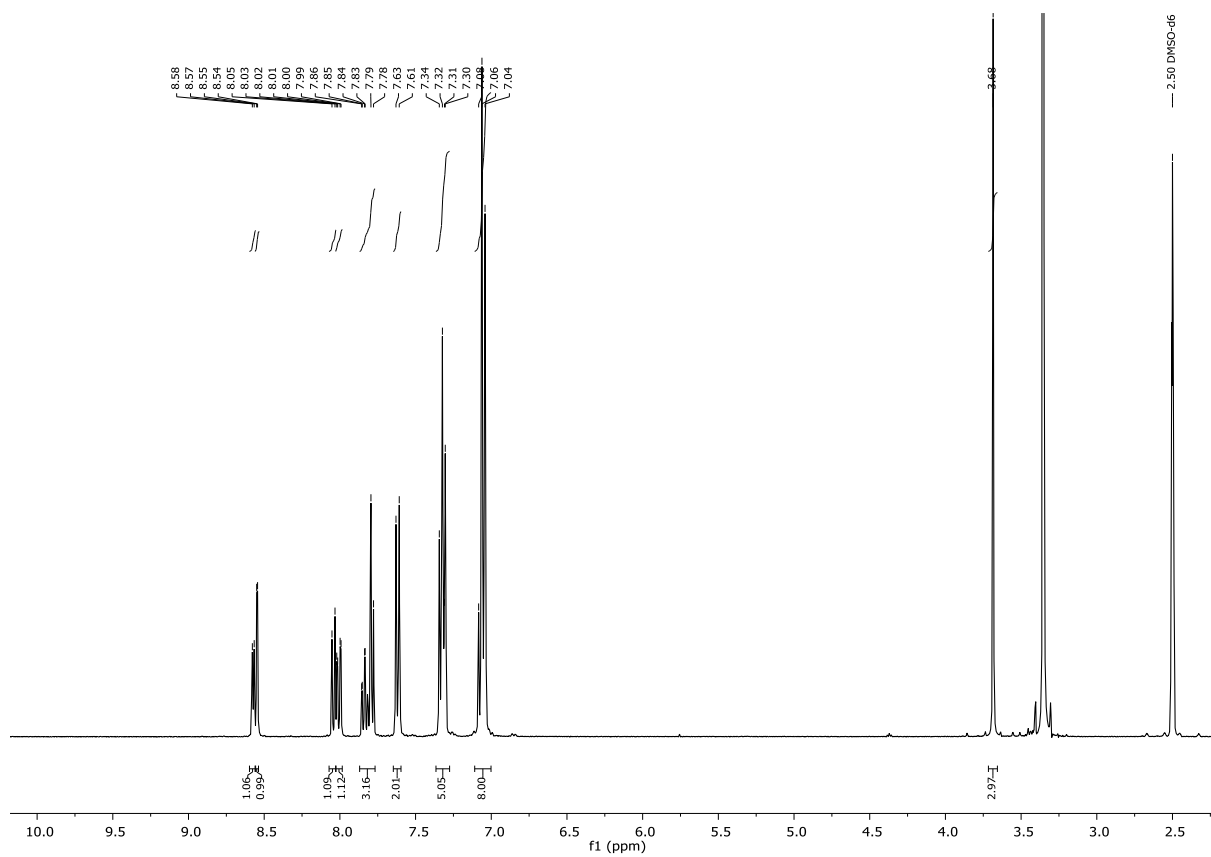

Figure S17.  $^1\text{H}$  NMR spectra of ligand **L** in  $d_6$ -DMSO.

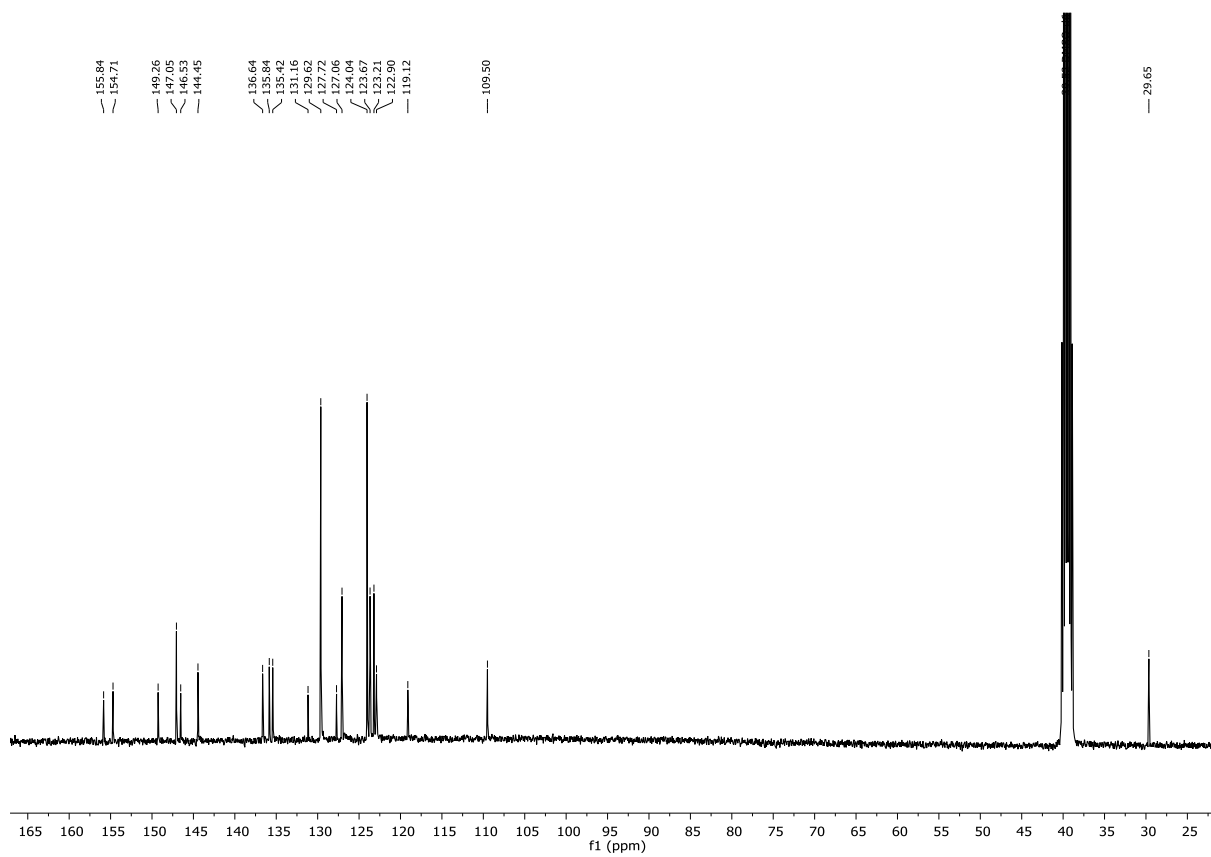

Figure S18.  $^{13}\text{C}$  NMR spectra of ligand **L** in  $d_6$ -DMSO.

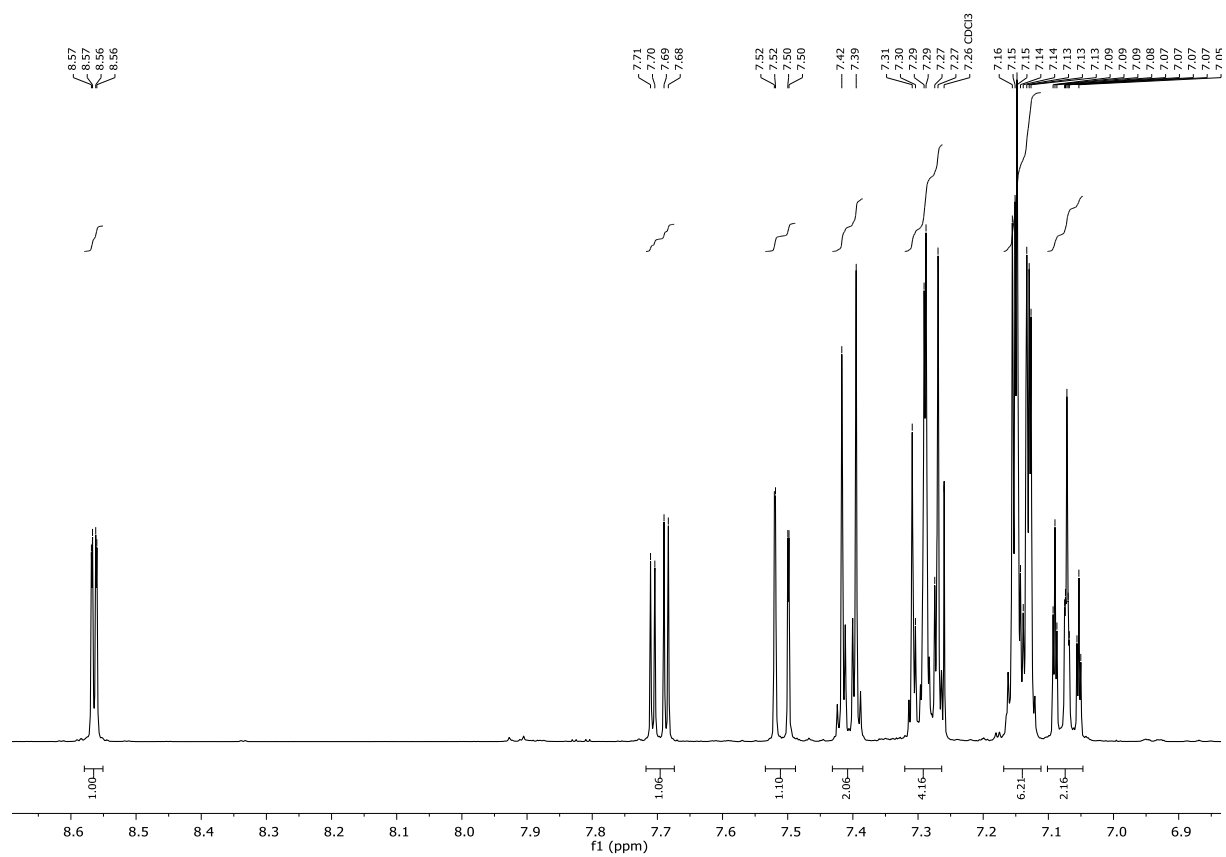

**Figure S19.** <sup>1</sup>H NMR spectra of compound **A** in CDCl<sub>3</sub>.

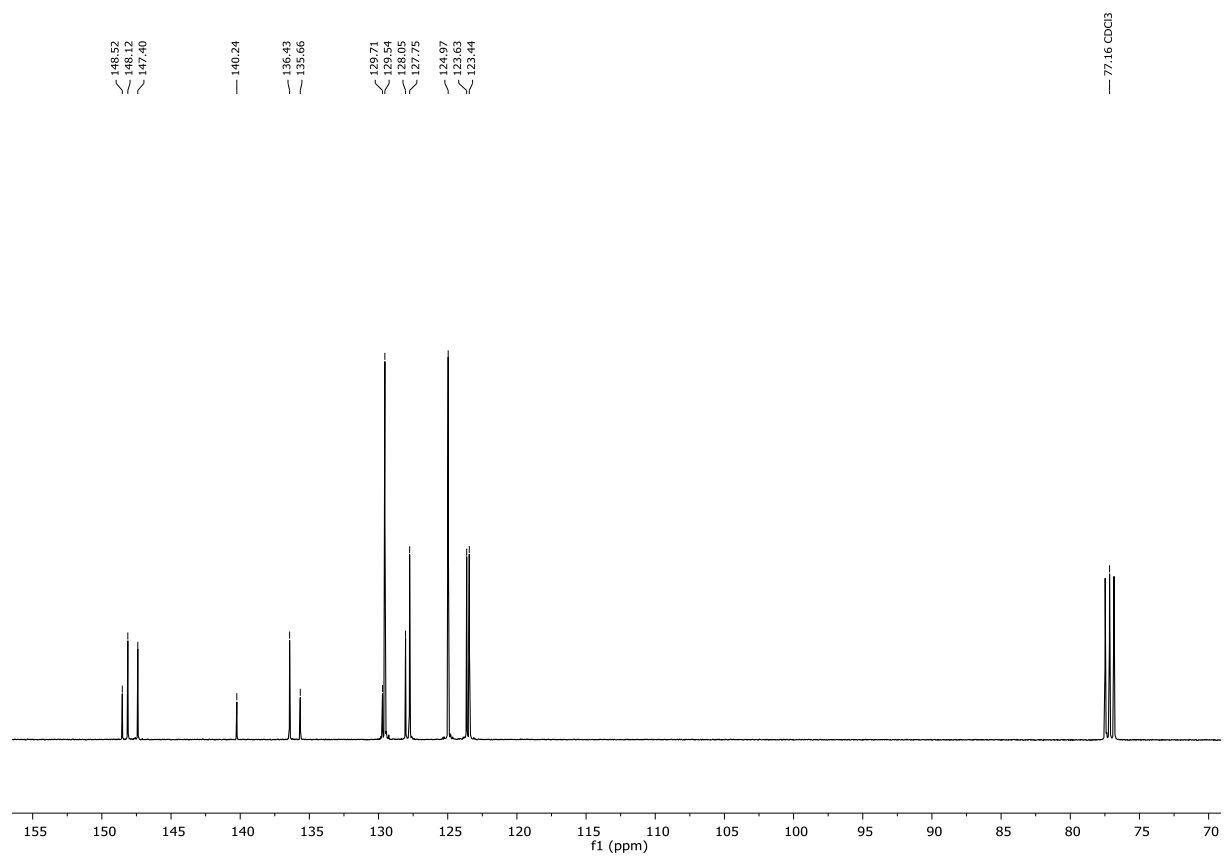

**Figure S20.** <sup>13</sup>C NMR of compound **A** in CDCl<sub>3</sub>.

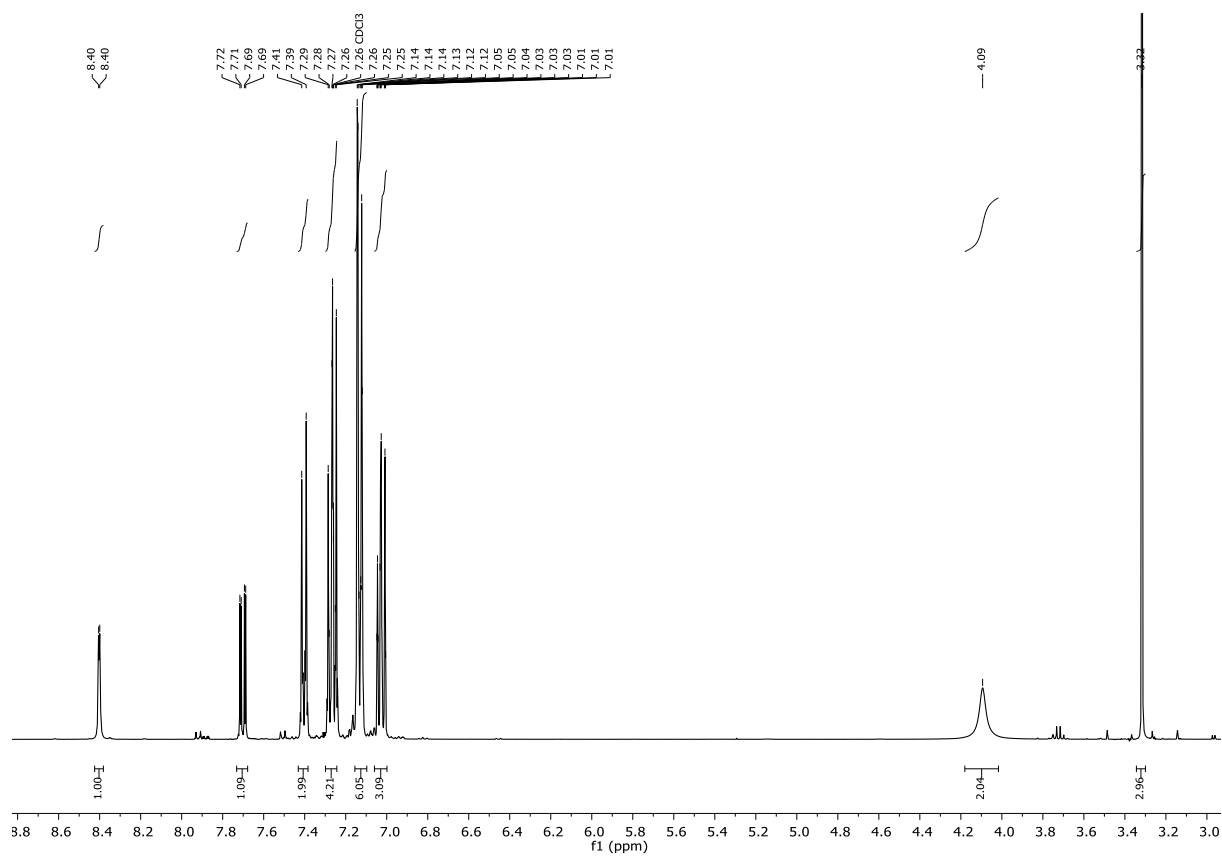

**Figure S21.**  $^1\text{H}$  NMR spectra of compound **B** in  $\text{CDCl}_3$ .

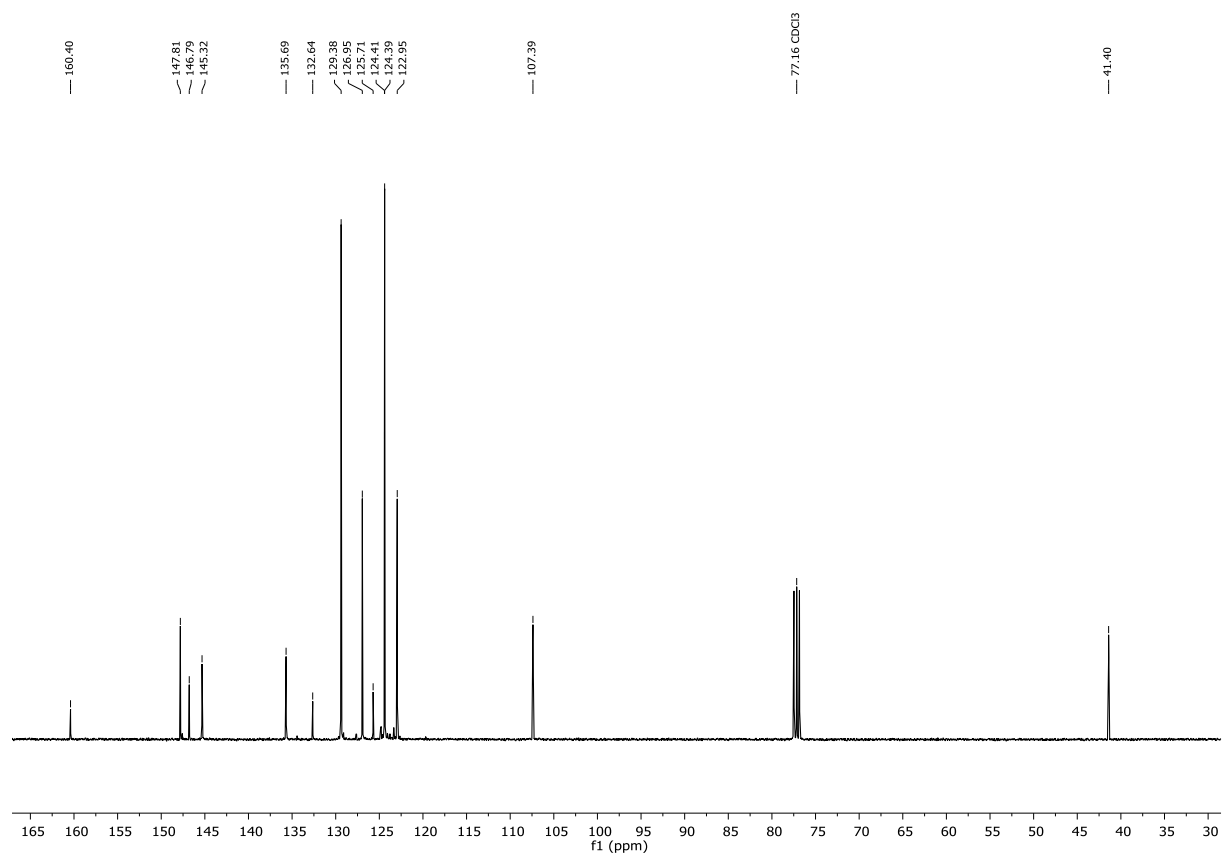

**Figure S22.**  $^{13}\text{C}$  NMR spectra of compound **B** in  $\text{CDCl}_3$ .
